# Supplementary material for: Selected Plant Metabolites Involved in Oxidation-Reduction Processes during Bud Dormancy and Ontogenetic Development in Sweet Cherry Buds (Prunus avium L.)
Source: MDPI journal article supplement (doi:10.3390/molecules23051197), 2018-05-17
Supplement: s1 [file s1]

# Selected plant metabolites involved in oxidation-reduction processes during bud dormancy and ontogenetic development in sweet cherry buds (*Prunus avium* L.).

Susanne Baldermann<sup>1,2</sup>, Thomas Homann<sup>1</sup>, Susanne Neugart<sup>2</sup>, Frank-M. Chmielewski<sup>3</sup>, Klaus-Peter Götz<sup>3</sup>, Kristin Gödeke<sup>4</sup>, Gerd Huschek<sup>4</sup>, Getrud E. Morlock<sup>5</sup>, Harshadrai M. Rawel<sup>\*</sup>

<sup>1</sup> Institute of Nutritional Science, University of Potsdam, Arthur-Scheunert-Allee 114-116, 14558 Nuthetal, Potsdam, Germany

<sup>2</sup> Leibniz Institute of Vegetable and Ornamental Crops (IGZ), Theodor-Echtermeyer-Weg 1, 14979 Großbeeren, Germany

<sup>3</sup> Agricultural Climatology, Faculty of Life Sciences, Humboldt-University of Berlin, Albrecht-Thaer-Weg 5, 14195 Berlin, Germany

<sup>4</sup> IGV-Institut für Getreideverarbeitung GmbH, Arthur-Scheunert-Allee 40/41, D-14558, Nuthetal OT Bergholz-Rehbrücke, Germany

<sup>5</sup> Justus Liebig University Giessen, Chair of Food Sciences, Institute of Nutritional Science, Interdisciplinary Research Center (IFZ), Heinrich Buff Ring 26-32, D-35392 Giessen, Germany

\* Correspondence: rawel@uni-potsdam.de; Tel.: + 49-33200-88-5525 / -5578

## Supplementary information S1: Sugar identification by HPTLC

The sugars (all >98 %; vwr, Darmstadt, Germany) were dissolved in water together in a stock solution mixture (1 mg·mL<sup>-1</sup> each). The standard solution mixture was prepared by pipetting 100 µL of the stock solution mixture together with 1.5 mL methanol in a sampler vial (63 ng·µL<sup>-1</sup> each). The sample (1 µL) and standard mixture solutions (1-10 µL) were applied bandwise on the HPTLC plate silica gel 60 ((20 cm × 10 cm; Merck, Darmstadt, Germany). The following settings of the Automatic TLC Sampler 4 (ATS 4, CAMAG) were used for application of 19 tracks: dosage speed 150 nL·s<sup>-1</sup>, band length 8 mm, track distance 9.5 mm, distance from lower edge 8 mm and side edge 15 mm. After tank saturation in the Automatic Developing Chamber (ADC 2, CAMAG) for 15 min, chromatography was automatically performed with 12 mL n-butanol – i-propanol – glacial acetic acid – aqueous 2 % boric acid solution 6:14:1:3 (V/V/V/V) up to a migration distance of 60 mm according to a previous method [1]. The chromatogram was dried 1 min before and 2 min after the development. For post-chromatographic derivatization, the chromatogram was immersed in the aniline diphenylamine o-phosphoric acid reagent (mixture of 70 mL each of 2 % aniline and 2 % diphenylamine solutions, both in acetone, and 10 mL o-phosphoric acid, 85 %) via the TLC Immersion Device (immersion time 0 s, speed 3.5 cm·s<sup>-1</sup>), followed by heating on the TLC Plate Heater (120 °C, 5 min). Stored in the refrigerator, the reagent was stable for weeks. The chromatograms were documented at UV 366 nm and white light illumination in transmission/reflection mode using the TLC Visualizer. Densitometry via absorption measurement at 380 nm was performed with TLC Scanner 4 and winCATS software using a slit dimension of 6.0 mm x 0.1 mm and a scanning speed of 10 mm·s<sup>-1</sup>. Non-derivatized marked zones were directly eluted with 100 % methanol at a flow rate of 0.1 mL·min<sup>-1</sup> (HP 1100 ChemStation pump, Agilent, Waldbronn, Germany) via the TLC-MS Interface (CAMAG, 4 mm x 2 mm oval elution head installed) into the electrospray ionization (ESI) single quadrupol MS (Expresslon CMS, Advion, Ithaca, NY, USA).

### Supplementary Table S1

Determination of the different phenological development stages from leaf fall (LF) in DOY (day of the year) for the seasons 2014/15 to 2016/17 as published in [2,3];  $t_1$  = endodormancy release,  $t_1^*$  = beginning of ontogenetic development, SB = swollen bud, SG = side green, GT = green tip, TC = tight cluster.

| Stage   | 2014/15 | 2015/16 | 2016/17 |
|---------|---------|---------|---------|
| LF      | 322     | 307     | 313     |
| $t_1$   | 343     | 328     | 341     |
| $t_1^*$ | 41      | 61      | 45      |
| SB      | 76      | 89      | 66      |
| SG      | 86      | 92      | 76      |
| GT      | 92      | 97      | 82      |
| TC      | 105     | 102     | 90      |
| OC      | 107     | 105     | 94      |

### Supplementary Table S2

Duration (D in d) and average temperature (T in °C) observed during the different development stages for the seasons 2014/15 to 2016/17 as published in [2,3];  $t_1$  = endodormancy release,  $t_1^*$  = beginning of ontogenetic development, SB = swollen bud, SG = side green, GT = green tip, TC = tight cluster, M = mean, SD = standard deviation.

| Stage           | 2014/15 |      | 2015/16 |      | 2016/17 |      | M ± SD      |            |
|-----------------|---------|------|---------|------|---------|------|-------------|------------|
|                 | D       | T    | D       | T    | D       | T    | D           | T          |
| LF- $t_1$       | 21      | 2.6  | 21      | 9.4  | 28      | 3.0  | 23.3 ± 4.0  | 5.0 ± 3.8  |
| $t_1$ - $t_1^*$ | 63      | 2.8  | 98      | 3.7  | 70      | 0.6  | 77.0 ± 18.5 | 2.4 ± 1.6  |
| $t_1^*$ -SB     | 35      | 4.1  | 28      | 4.7  | 21      | 5.8  | 28.0 ± 7.0  | 4.9 ± 0.9  |
| SB-SG           | 10      | 6.7  | 3       | 7.4  | 10      | 5.8  | 7.7 ± 4.0   | 6.6 ± 0.8  |
| SG-GT           | 6       | 6.6  | 5       | 12.8 | 6       | 7.6  | 5.7 ± 0.6   | 9.0 ± 3.3  |
| GT-TC           | 13      | 8.3  | 5       | 9.2  | 8       | 9.4  | 8.7 ± 4.0   | 9.0 ± 0.6  |
| TC-OC           | 2       | 13.5 | 3       | 11.4 | 4       | 13.7 | 3.0 ± 1.0   | 12.9 ± 1.3 |

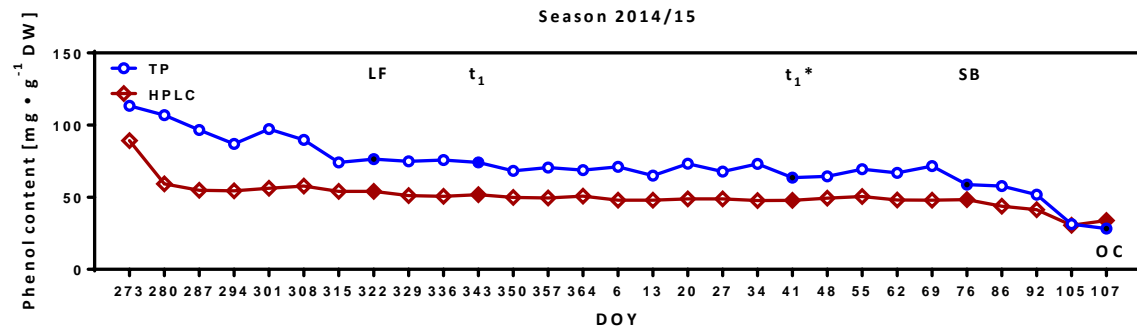

Figure S1: Comparison of the weekly and development orientated changes of the content of phenolic compounds for season 2014/15 as determined by HPLC and total phenols by Folin-Ciocalteu phenol method (TP). Filled symbols indicate the timings. Abbreviations: LF, leaf fall;  $t_1$  = endodormancy release,  $t_1^*$  = beginning of ontogenetic development, SB = swollen bud, SG = side green, GT = green tip, TC = tight cluster, OC = open cluster; DOY, day of year; DW, dry weight.

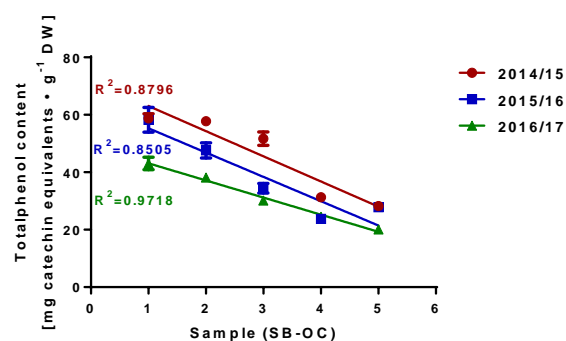

Figure S2: Correlation ( $p = 0.008$ ) of the content of total phenolic compounds for the timings SB – OC of the three seasons 2014/15 - 2016/17. Slope is different for each data set (season). The correlation factors are for mean of 4 replications, error bars show the standard deviations. Abbreviations: SB (1) = swollen bud, SG (2) = side green, GT (3) = green tip, TC (4) = tight cluster, OC (5) = open cluster; DW, dry weight. Respective sample numbers are given in brackets.

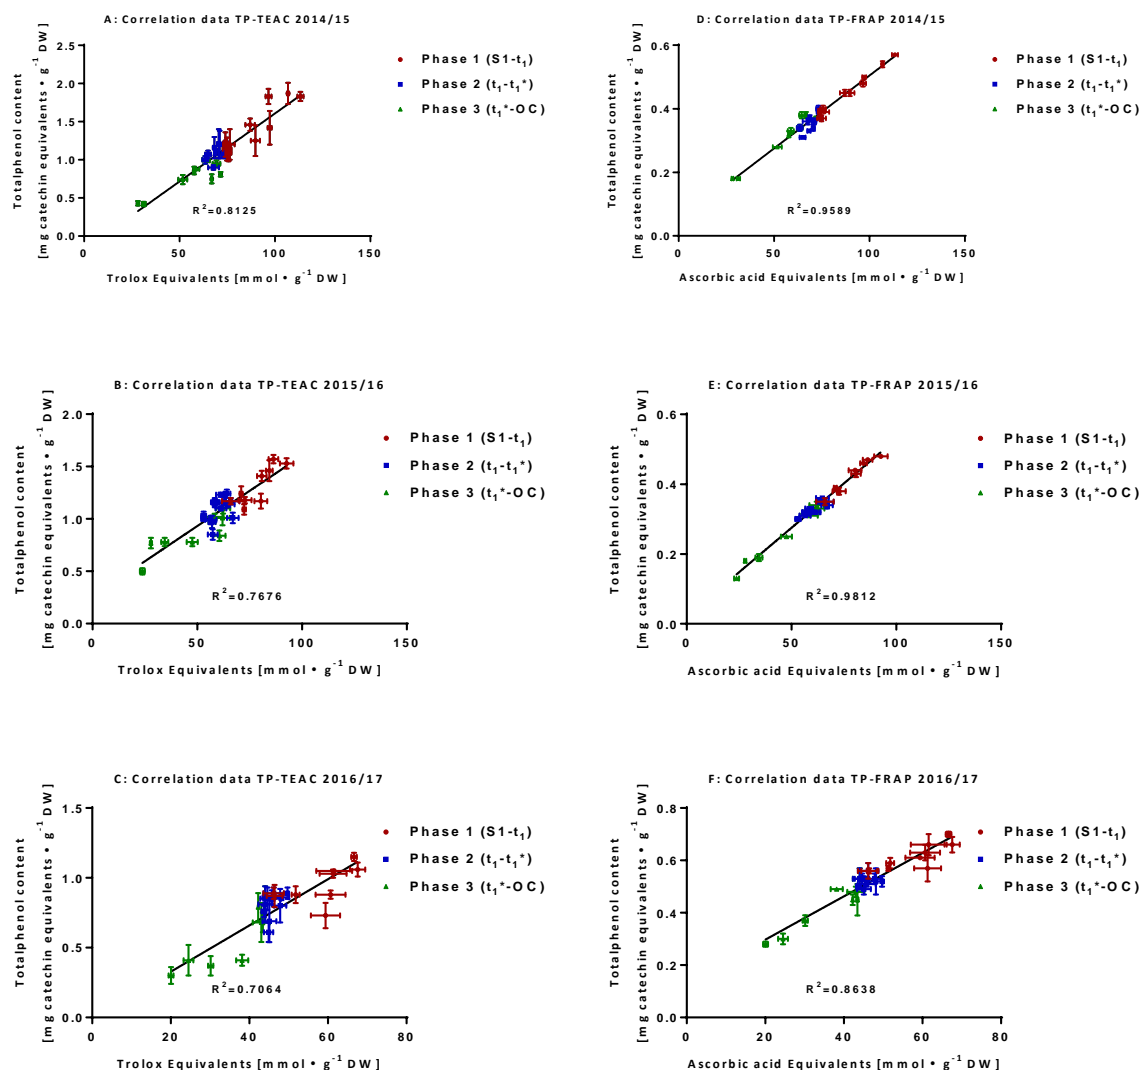

Figure S3: Correlation of the content of total phenolic compounds to the anti-oxidative potential (data presented as trolox (TEAC) or ascorbic acid (FRAP) equivalents) for the three seasons 2014/15 - 2016/17. The illustration shows the three phases of weekly and development orientated changes (S<sub>1</sub>-t<sub>1</sub>; t<sub>1</sub>-t<sub>1</sub>\*; t<sub>1</sub>\*-OC). The correlation factors are for mean of 4 replications, error bars show the standard deviations. Abbreviations: S<sub>1</sub> = first sampling date, t<sub>1</sub> = endodormancy release, t<sub>1</sub>\* = beginning of ontogenetic development, OC = open cluster, DW, dry weight.

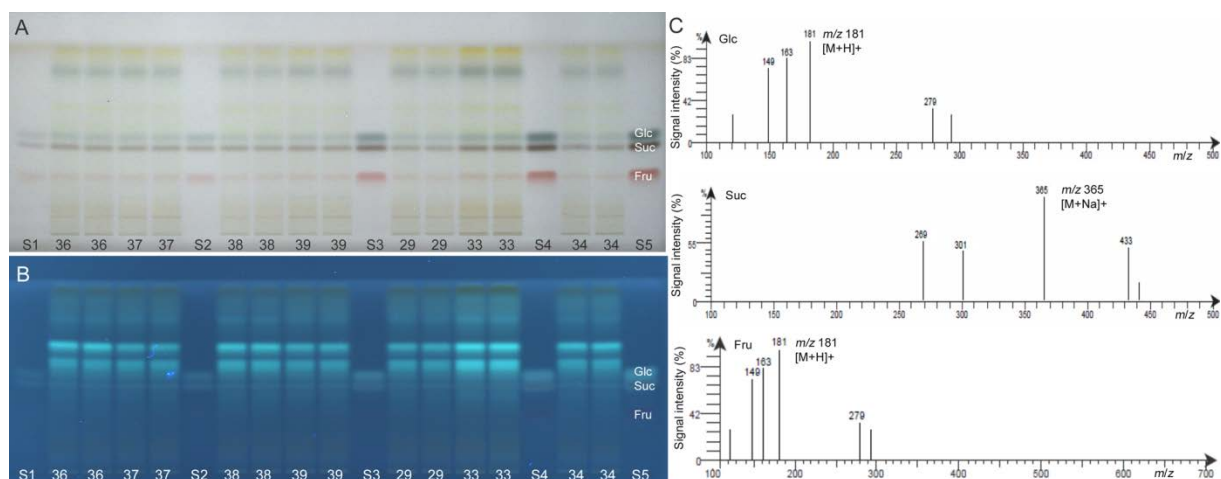

Figure S4: HPTLC separation/identification of sugars (season 2014/15) in cherry blossom bud extracts (1  $\mu$ L/band; no. 29,33,34,36-39) besides standard mixture (S1-S5; 63-630 ng/band) derivatized with the aniline diphenylamine o-phosphoric acid reagent and documented at (A) white light illumination and (B) UV at 366 nm as well as (C) HPTLC-ESI<sup>+</sup>-MS spectra of the three main sugars.

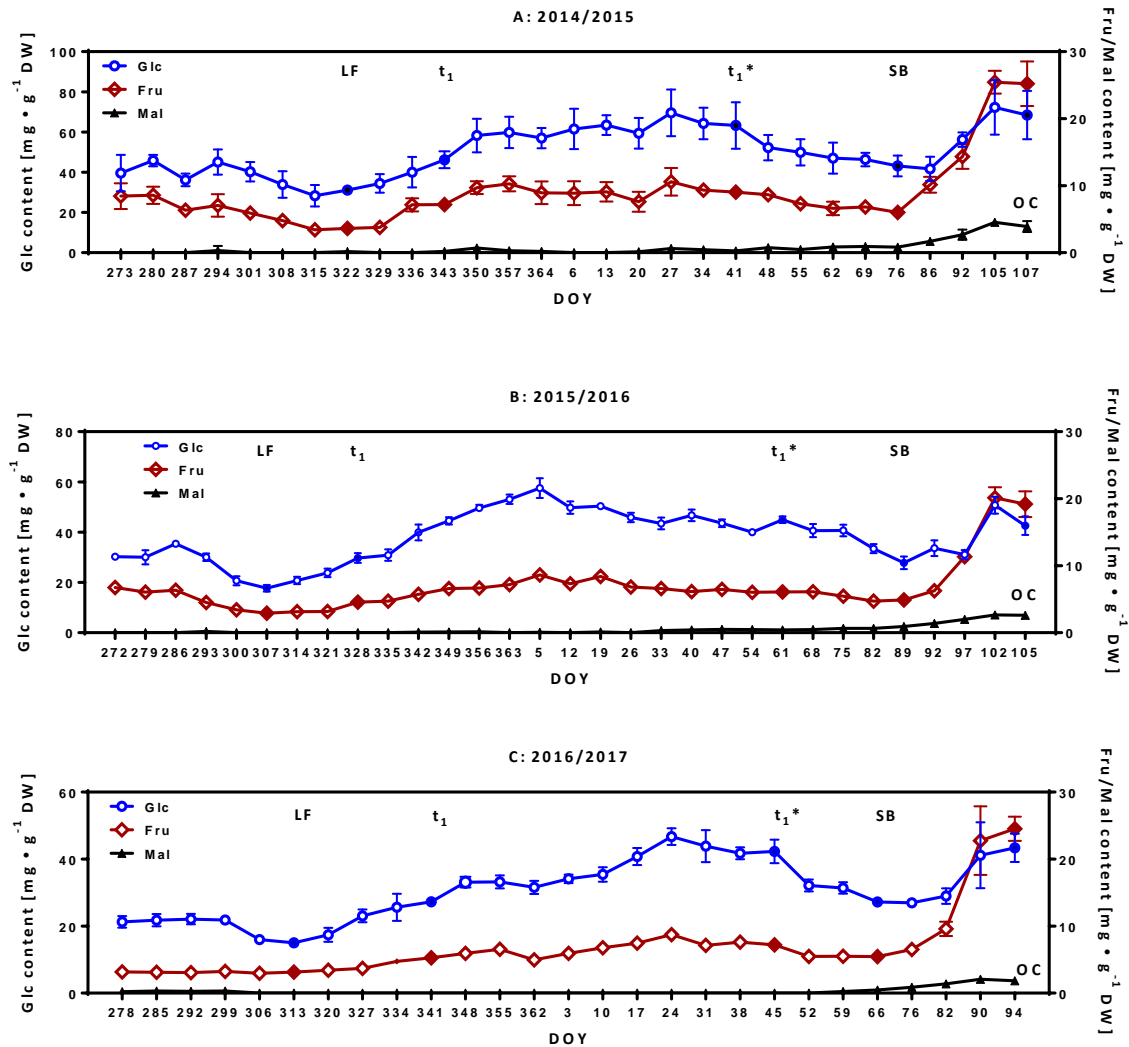

Figure S5: Weekly and development orientated changes of the content of reducing sugars. A: Season 2014/15; B: Season 2015/16 and C: Season 2016/17. Filled symbols indicate the timings. Abbreviations: Glc, glucose; Fru, fructose; Mal, maltose; LF, leaf fall;  $t_1$  = endodormancy release,  $t_1^*$  = beginning of ontogenetic development, SB = swollen bud, SG = side green, GT = green tip, TC = tight cluster, OC = open cluster, DOY, day of year; DW, dry weight.

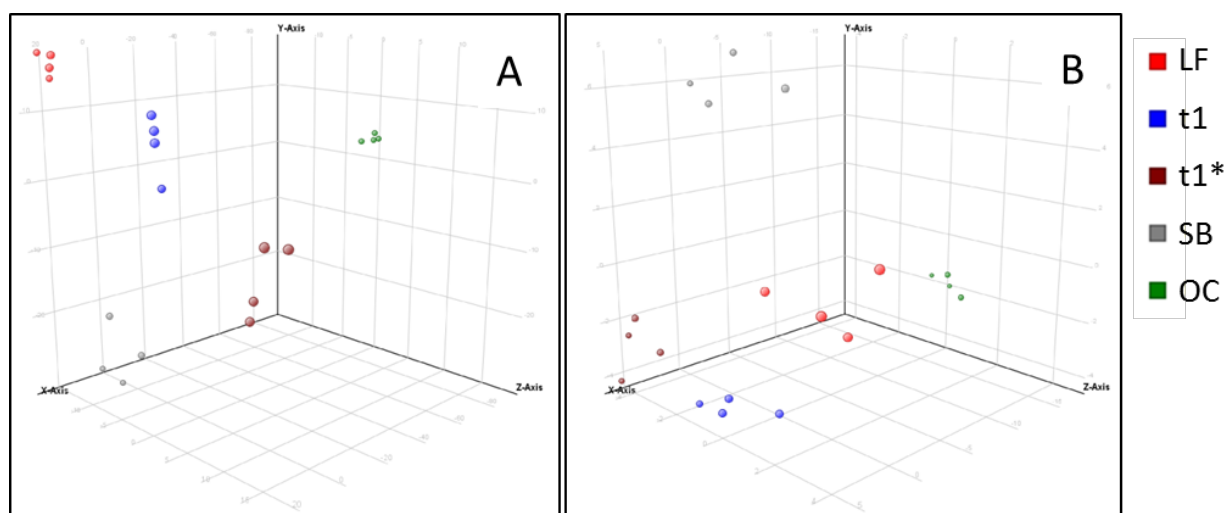

Figure S6: Principal component analysis ( $p \leq 0.05$ ) on the metabolites present during the different timings of the development stages as determined by untargeted MS analysis for the season 2014/15;  $m/z$ : 100-1700. A: Fold change  $\geq 2$  in negative modulus with PC1= 66.06% (x-axis), PC2=7.79% (y-axis) and PC3=3.72% (z-axis). B: Fold change  $\geq 1.5$  in positive modulus with PC1= 60.8% (x-axis), PC2=9.99% (y-axis) and PC3=6.27% (z-axis). Abbreviations: LF, leaf fall;  $t_1$  = endodormancy release,  $t_1^*$ = beginning of ontogenetic development, SB = swollen bud, OC = open cluster.

Supplementary Table S3: Log fold change (up- and down regulation) of selected metabolites as compared to LF present during the different timings of the development stages as determined by untargeted MS analysis for the season 2014/15. Abbreviations: LF, leaf fall;  $t_1$  = endodormancy release,  $t_1^*$ = beginning of ontogenetic development, SB = swollen bud, OC = open cluster; n.d. = not detected.

| Compound/<br>Stage               | $t_1$  | $t_1^*$ | SB     | OC     |
|----------------------------------|--------|---------|--------|--------|
| Glutathione,<br>oxidized         | n.d.   | -4.09   | -8.27  | -16.09 |
| Glutathione,<br>reduced          | 4.80   | 19.11   | 18.25  | 15.44  |
| Asp Met Trp                      | 17.58  | 17.98   | 17.97  | 18.66  |
| Maltotetraose                    | 19.41  | -13.73  | -18.18 | -18.18 |
| 4'-Hydroxyacetophenone           | -16.96 | n.d.    | -4.47  | -16.96 |
| Epigallocatechin                 | 5.24   | 5.38    | -9.22  | -13.75 |
| Methyl 3,4-dicaffeoylquinic acid | 14.43  | 4.70    | -4.71  | -4.71  |
| Phosphatidyl glycerol            | -9.08  | -9.00   | -17.52 | n.d.   |
| Phytosphingosine                 | -4.28  | 8.42    | -8.39  | -8.39  |
| Dehydrophytosphingosine          | -9.76  | -13.07  | -1.58  | 2.40   |



## References

1. Morlock, G.E.; Sabir, G. Comparison of two orthogonal liquid chromatographic methods for quantitation of sugars in food. *J. Liq. Chromatogr. Relat. Technol.* **2011**, *34*, 902-919.
2. Chmielewski, F.M.; Baldermann, S.; Gotz, K.P.; Homann, T.; Schumacher, F.; Huschek, G.; Rawel, H. Absciscic acid related metabolites in sweet cherry buds *J. Hort.* **2018**, *5*, 221.
3. Chmielewski, F.M.; Gotz, K.P. Identification and timing of dormant and ontogenetic phase for sweet cherries in northeast Germany for modelling purposes. *J. Hort.* **2017**, *4*, 205.
